# Supplementary material for: Independent and combined effects of dietary iron composition and selected risk factors on the risk of NAFLD in a Chinese population
Source: PubMed Central journal article supplement (PMC6411980; doi:10.1038/s41598-019-40449-1), 2019-03-11
Supplement: 41598_2019_40449_MOESM1_ESM.pdf [file 41598_2019_40449_MOESM1_ESM.pdf]

# **Independent and combined effects of dietary iron composition and selected risk factors on the risk of NAFLD in a Chinese population**

Xian-E Peng<sup>1,2\*</sup>, Shang-Hua Xu<sup>3</sup>, Wenjun Liu<sup>1</sup>, Zhijian Hu<sup>1</sup>, Zheng Lin<sup>1</sup>, Xu Lin<sup>2</sup>

<sup>1</sup>Department of Epidemiology and Health Statistics, Fujian Provincial Key Laboratory of Environment Factors and Cancer, School of Public Health, Fujian Medical University, Fujian, China.

<sup>2</sup>Key Laboratory of Ministry of Education for Gastrointestinal Cancer, Fujian Medical University, Fujian, China.

<sup>3</sup>Department of Cardiology, Affiliated Nanping First Hospital, Fujian Medical University, Nanping, China

§ Corresponding author. Xian-E Peng, Department of Epidemiology and Health Statistics, Fujian Provincial Key Laboratory of Environment Factors and Cancer, School of Public Health, Fujian Medical University, Fuzhou, China, 350108

Phone: +86-591 22862648

E-mail: [fmuxe@163.com](mailto:fmuxe@163.com)

| Dietary iron (mg/d) | NAFLD patients | controls   | t           | <i>P</i> |
|---------------------|----------------|------------|-------------|----------|
| Total iron          | 21.46±7.13     | 21.24±7.08 | 0.68        | 0.499    |
| Heme-iron           | 7.55± 3.80     | 6.99± 4.00 | <b>3.00</b> | 0.003    |
| Non-heme iron       | 13.91±5.86     | 14.25±5.55 | -1.26       | 0.208    |

**Table S1.** The association between dietary iron intake and NAFLD among subjects without alcohol consumption

| Quantitative phenotype   | NAFLD        |              |              |              |                       | Control      |              |              |              | <i>P</i> <sup>a</sup> |
|--------------------------|--------------|--------------|--------------|--------------|-----------------------|--------------|--------------|--------------|--------------|-----------------------|
|                          | Q1 (n=240)   | Q2 (n=314)   | Q3 (n=528)   | Q4 (n=191)   | <i>P</i> <sup>a</sup> | Q1 (n=318)   | Q2 (n=319)   | Q3 (n=473)   | Q4 (n=163)   |                       |
| BMI (kg/m <sup>2</sup> ) | 24.67±2.77   | 24.95±2.86   | 25.58±2.85   | 25.49±2.52   | <0.01                 | 22.31±2.57   | 22.39±2.32   | 22.31±2.42   | 22.42±2.20   | 0.93                  |
| FBS (mmol/L)             | 5.83±1.45    | 5.67±1.43    | 6.19±10.83   | 5.50±0.59    | 0.61                  | 5.48±1.48    | 5.27±1.15    | 5.39±0.84    | 5.24±1.23    | 0.07                  |
| TC(mmol/L)               | 5.26±0.85    | 5.28±0.99    | 5.40±1.05    | 5.22±0.83    | 0.09                  | 5.18±0.95    | 5.07±1.20    | 5.12±1.07    | 4.76±0.93    | <0.01                 |
| TG(mmol/L)               | 2.05±1.26    | 2.08±1.36    | 1.94±1.33    | 1.95±1.21    | 0.40                  | 1.40±1.02    | 1.44±1.12    | 1.20±0.59    | 1.35±0.93    | <0.01                 |
| HDL-C (mmol/L)           | 1.31±0.22    | 1.30±0.26    | 1.28±0.56    | 1.29±0.28    | 0.34                  | 3.75±4.56    | 3.90±5.74    | 3.57±3.53    | 3.00±3.73    | <0.01                 |
| LDL-C (mmol/L)           | 3.60±4.12    | 3.82±5.01    | 3.74±2.82    | 3.28±3.38    | 0.45                  | 1.35±0.23    | 1.35±0.32    | 1.54±0.71    | 1.54±0.41    | 0.19                  |
| SBP (mm Hg)              | 125.78±14.85 | 126.21±13.35 | 126.74±13.32 | 126.68±13.30 | 0.71                  | 118.40±14.24 | 118.23±13.68 | 119.56±11.56 | 119.62±11.72 | 0.37                  |
| DBP (mm Hg)              | 81.59±9.76   | 82.75±9.79   | 81.43±9.91   | 81.42±10.96  | 0.27                  | 76.89±10.07  | 76.68±9.92   | 78.05±9.79   | 77.53±10.56  | 0.89                  |
| AST (IU/L)               | 24.10±8.46   | 25.24±8.16   | 25.32±19.93  | 26.58±12.14  | 0.39                  | 22.57±7.39   | 23.29±15.68  | 23.33±12.12  | 26.04±55.98  | 0.46                  |
| ALT (IU/L)               | 27.83±15.88  | 33.11±17.32  | 35.09±39.01  | 38.50±25.12  | 0.001                 | 21.50±12.42  | 23.39±26.03  | 26.48±33.48  | 31.6079      | 0.18                  |
| UA (mmol/L)              | 352.70±87.78 | 380.74±93.86 | 377.59±84.10 | 395.07±76.89 | <0.01                 | 316.56±81.96 | 333.36±87.14 | 334.69±75.77 | 360.68±88.95 | <0.01                 |
| apoA1 (mmol/L)           | 1.26±0.13    | 1.31±0.88    | 1.21±0.29    | 1.27±0.17    | 0.059                 | 1.30±0.14    | 1.29±0.16    | 1.29±0.21    | 1.31±0.22    | 0.32                  |
| apoB (mmol/L)            | 1.05±0.21    | 1.04±0.22    | 0.99±0.22    | 1.01±0.18    | <0.01                 | 1.01±0.22    | 0.99±0.21    | 0.91±0.20    | 0.92±0.21    | <0.01                 |

**Table S2. Comparison of various quantitative phenotypes among the different quartiles of animal-derived iron in patients with NAFLD and control subjects.**

Data are represented as the mean  $\pm$  SD. *a*: Data were analyzed using the Kruskal–Wallis test in each group of NAFLD and control subjects.
